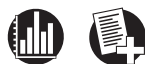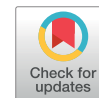

# BMI and All-Cause Mortality in Normoglycemia, Impaired Fasting Glucose, Newly Diagnosed Diabetes, and Prevalent Diabetes: A Cohort Study

Eun Young Lee,<sup>1</sup> Yong-ho Lee,<sup>2</sup>  
Sang-Wook Yi,<sup>3</sup> Soon-Ae Shin,<sup>4</sup> and  
Jee-Jeon Yi<sup>5</sup>

*Diabetes Care* 2017;40:1026–1033 | <https://doi.org/10.2337/dc16-1458>

## OBJECTIVE

This study examined associations between BMI and mortality in individuals with normoglycemia, impaired fasting glucose (IFG), newly diagnosed diabetes, and prevalent diabetes and identified BMI ranges associated with the lowest mortality in each group.

## RESEARCH DESIGN AND METHODS

A total of 12,815,006 adults were prospectively monitored until 2013. Diabetes status was defined as follows: normoglycemia (fasting glucose <100 mg/dL), IFG (100–125 mg/dL), newly diagnosed diabetes ( $\geq 126$  mg/dL), and prevalent diabetes (self-reported). BMI ( $\text{kg}/\text{m}^2$ ) was measured. Cox proportional hazards model hazard ratios were calculated after adjusting for confounders.

## RESULTS

During a mean follow-up period of 10.5 years, 454,546 men and 239,877 women died. U-shaped associations were observed regardless of diabetes status, sex, age, and smoking history. Optimal BMI ( $\text{kg}/\text{m}^2$ ) for the lowest mortality by group was 23.5–27.9 (normoglycemia), 25–27.9 (IFG), 25–29.4 (newly diagnosed diabetes), and 26.5–29.4 (prevalent diabetes). Higher optimal BMI by worsening diabetes status was more prominent in younger ages, especially in women. The relationship between worsening diabetes status and higher mortality was stronger with lower BMI, especially at younger ages. Given the same BMI, people with prevalent diabetes had higher mortality compared with those with newly diagnosed diabetes, and this was more striking in women than men.

## CONCLUSIONS

U-curve relationships existed regardless of diabetes status. Optimal BMI for lowest mortality became gradually higher with worsening diabetes for each sex and each age-group.

Individuals with diabetes who are classified by BMI ( $\text{kg}/\text{m}^2$ ) as overweight (25–29.9) or obese ( $\geq 30$ ) have been associated with lower mortality (an “obesity paradox”) compared with those classified as normal weight (1–4), with a few exceptions (5,6). However, these associations were observed primarily in people with prevalent diabetes. Optimal BMI for longevity remains unsettled, especially in people with incident diabetes (5), where the influence of diabetes duration and weight change secondary to

<sup>1</sup>Division of Endocrinology and Metabolism, Department of Internal Medicine, Seoul St. Mary's Hospital, College of Medicine, The Catholic University of Korea, Seoul, Republic of Korea

<sup>2</sup>Division of Endocrinology and Metabolism, Department of Internal Medicine, Yonsei University College of Medicine, Seoul, Republic of Korea

<sup>3</sup>Department of Preventive Medicine and Public Health, Catholic Kwandong University College of Medicine, Gangneung, Republic of Korea

<sup>4</sup>Big Data Steering Department, National Health Insurance Service, Wonju, Republic of Korea

<sup>5</sup>Institute for Occupational and Environmental Health, Catholic Kwandong University, Gangneung, Republic of Korea

Corresponding author: Sang-Wook Yi, [flyhigh@cku.ac.kr](mailto:flyhigh@cku.ac.kr).

Received 6 July 2016 and accepted 16 March 2017.

This article contains Supplementary Data online at <http://care.diabetesjournals.org/lookup/suppl/doi:10.2337/dc16-1458/-/DC1>.

E.Y.L. and Y.-h.L. contributed equally to this work.

© 2017 by the American Diabetes Association. Readers may use this article as long as the work is properly cited, the use is educational and not for profit, and the work is not altered. More information is available at <http://www.diabetesjournals.org/content/license>.

See accompanying article, p. 1000.

diabetes progression and treatment was minimized, and in never smokers, where smoking-related confounding was minimized (1,5).

Overweight or obesity has generally been associated with the lowest mortality in people with diabetes. However, it is unclear whether the BMI range associated with lowest mortality is higher in people with diabetes than it is in the general population, because studies have also shown that overweight compared with normal weight is associated with decreased risk of death in general populations (7,8). In addition, some researchers suggest that the optimal BMI may be higher in people with manifest chronic disease (3,4,9–11). If such a distinction exists, one might expect the optimal BMI to be greater as disease severity increases; in the case of diabetes, from normoglycemia to impaired fasting glucose (IFG), to newly diagnosed diabetes, and to prevalent diabetes. However, higher BMI according to diabetes severity has not been previously examined.

We monitored a large prospective cohort study ( $n = 12,815,006$ ) that included individuals with known prevalent diabetes ( $n = 359,645$ ) and newly diagnosed diabetes ( $n = 546,232$ ) to elucidate the association between BMI and mortality and to identify optimal BMI for longevity according to diabetes status (normoglycemia, IFG, newly diagnosed diabetes, and prevalent diabetes). We also examined whether associations by diabetes status differ by sex and age, as a previous report showed that the association between BMI and mortality substantially varies by sex and age (12). We also explored associations in never smokers.

## RESEARCH DESIGN AND METHODS

### Study Population and Duration of Follow-up

The Korean Metabolic Risk Factor (KOMERIT) study was designed to evaluate associations between various metabolic risk factors and mortality in people aged 18–99 years who underwent routine health examinations between 2001 and 2004, courtesy of the National Health Insurance Service (NHIS) of Korea, which provides insurance coverage for 97% of the Korean population. Of the 12,845,017 beneficiaries, 26,346 individuals who were missing baseline information for serum glucose, blood pressure, total cholesterol, date of health examination,

or BMI were excluded, as were 3,665 people with weight  $<30$  kg, BMI  $\geq 50$  kg/m<sup>2</sup> or height  $<130$  cm (for age  $<55$  years) or  $<110$  cm (for age  $\geq 55$  years). The final study population ( $n = 12,815,006$ ) was monitored through December 2013 for survival (12). Information on specific causes of death was unavailable. This study was approved by the Institutional Review Board of Kwandong University, Republic of Korea.

### Measures

Cardiometabolic measures collected at baseline included fasting serum glucose, total cholesterol, and blood pressure. Height and weight were measured to the nearest centimeter and kilogram, respectively (12). BMI was calculated as weight in kilograms divided by the square of height in meters. Also collected were self-reported smoking history, alcohol use, and prevalent diabetes status (using a questionnaire that read, “Have you ever been diagnosed with or treated for diabetes?”). Fasting glucose levels (mg/dL) were used to categorize nonprevalent diabetes status as normoglycemia ( $<100$ ), IFG (100–125), or newly diagnosed diabetes ( $\geq 126$ ). Baseline disease status, including cancer, heart disease, and stroke, was assessed using the same questionnaire as for diabetes. Health examination and data collection used a standard protocol, the Health Examination Practice Guide, publicly available from the Ministry of Health and Welfare.

### Statistical Analysis

BMI ranges (kg/m<sup>2</sup>) were grouped as  $<17.5$ , 17.5–18.9, 19.0–20.4, 20.5–21.9, 22.0–23.4, 23.5–24.9, 25.0–26.4 (reference), 26.5–27.9, 28.0–29.4, 29.5–30.9, and  $\geq 31.0$ . The reference BMI was selected based on previous research in East Asians showing BMI of 25–27 was associated with the lowest risk of mortality (13). BMI was further grouped into four standard categories of  $<18.5$ , 18.5–24.9 (reference), 25.0–29.9, and  $\geq 30$  for between-study comparisons (7).

Hazard ratios (HRs) for BMI ranges relative to the reference group were calculated using Cox proportional hazards models stratified by age (years) at baseline (18–24, 25–34, 35–44, 45–54, 55–64, 65–74, 75–84, and 85–99) after adjustment for age at baseline as a continuous variable (within each age-group), sex (when applicable), smoking status (current smoker, former smoker, never smoker, and missing

information [ $n = 636,655$ ]), frequency of alcohol use (monthly or less, 2 days/month–2 days/week, 3–7 days/week, and missing information [ $n = 493,992$ ]), and physical activity at least once a week (yes or no). Metabolic mediators including systolic blood pressure, serum total cholesterol, and fasting glucose were not included in the main analysis but were included in the sensitivity analysis.

We examined associations separately, by diabetes status. To evaluate the combined effects of diabetes status and BMI, we combined 11 BMI categories and 4 categories of diabetes status into 44 groups and set normoglycemic people with BMI 25–26.4 kg/m<sup>2</sup> as the reference group. We stratified by sex and age (18–44, 45–54, 55–64, 65–74, and 75–99 years), because a previous study reported that associations between BMI and mortality differed by sex and age in this population (12). The effect modification (change in optimal BMI) between BMI and diabetes status for each sex and each age-group was assessed by introducing a linear interaction term (diabetes status  $\times$  BMI), assuming quadratic association between BMI and mortality. The *P* value of the quadratic interaction term, when it was included, was  $>0.05$  in both sexes at all ages combined.

Subgroup analyses were performed among never smokers and individuals without prevalent cancer, heart disease, or stroke, after excluding the first 3 years of follow-up. The subgroup analyses also served as a sensitivity analysis.

Sex- and age-standardized death rates per 100,000 person-years were calculated, as previously reported (12), and are presented in Supplementary Table 1. All *P* values were two-sided, and SAS 9.4 software (SAS Institute, Inc., Cary, NC) was used in all analyses.

## RESULTS

Of the 12,815,006 people studied, 43.1% were women. During 134.9 million person-years of follow-up, 454,546 men and 239,877 women died (Supplementary Table 1). At baseline, the mean  $\pm$  SD age was  $44.4 \pm 14.2$  years.

### Characteristics by Diabetes Status

Baseline diabetes status was as follows: 73.4% normoglycemia, 19.5% IFG, 4.3% newly diagnosed diabetes, and 2.8% prevalent diabetes. Mean age and BMI increased with worsening diabetes (Table 1). As



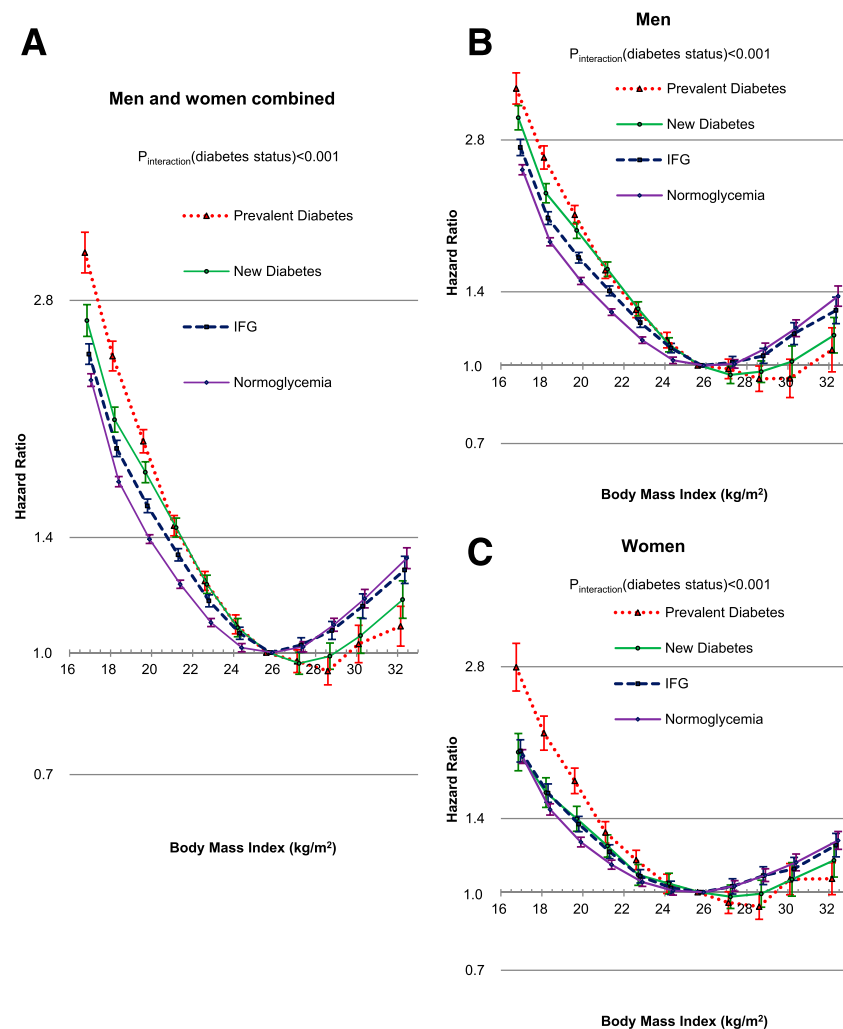

**Figure 1**—HRs for mortality in 11 BMI categories by diabetes status and sex for men and women (A), men (B), and women (C). BMI categories ( $\text{kg}/\text{m}^2$ ): <math><17.5</math>, 17.5–18.9, 19.0–20.4, 20.5–21.9, 22.0–23.4, 23.5–24.9, 25.0–26.4 [reference], 26.5–27.9, 28.0–29.4, 29.5–30.9, and  $\geq 31.0$ . The midpoint was used as a representative value for each BMI category except for both ends (16.9 and 32.3), for which the median of all participants was used. HRs and 95% CIs were calculated using Cox proportional hazards models stratified by baseline age (18–24, 25–34, 35–44, 45–54, 55–64, 65–74, 75–84, and 85–99 years) after adjustment for age at baseline as a continuous variable (within each age-group), sex, smoking history, alcohol use, and physical activity.

prevalent diabetes (Supplementary Tables 6–9, respectively).

## CONCLUSIONS

This large prospective cohort of 12.8 million adults clearly demonstrated that optimal BMI for longevity was higher with worsening diabetes regardless of sex and age, except perhaps in individuals aged 75 years or older. Although previous studies reported various (U-curve, L-curve, or inverse linear) types of associations between BMI and mortality in diabetes (2,3,5,14–16), we observed a consistent U-shaped relationship regardless of diabetes status in each sex and all age-groups.

## Difference in Optimal BMI With Worsening Diabetes Status

Across all age-groups, there was a difference of  $\sim 1.5 \text{ kg}/\text{m}^2$  in optimal BMI between newly diagnosed diabetes and normoglycemia. Several previous studies suggested a larger difference, with optimal BMI  $\geq 5 \text{ kg}/\text{m}^2$  higher in people with diabetes compared with the general population or populations without diabetes (2–4,16). Most of these investigations were performed in the context of prevalent diabetes (4,6,8,14–17). According to our results, however, prevalent diabetes was associated with a greater difference in optimal BMI ( $1.5\text{--}3 \text{ kg}/\text{m}^2$ ) than was newly

diagnosed diabetes ( $\sim 1.5 \text{ kg}/\text{m}^2$ ). Further, previous studies compared older (usually  $\geq 60$  years) people with diabetes with substantially younger general populations or with BMI values that were assessed decades earlier when mean BMI was substantially lower than in recent years (3,8,16–18). Owing to the small numbers of participants, crude BMI categories in many previous studies make it difficult to detect mild differences (analysis according to the World Health Organization BMI categories in Supplementary Tables 10 and 11).

The Nurses' Health Study (NHS) reported results of people with incident diabetes and also all participants in the same population. The mortality rate was lowest at BMI 19–26.9  $\text{kg}/\text{m}^2$  among all subjects (19), while there was no difference in mortality risk for those with a BMI of 27.5–29.9  $\text{kg}/\text{m}^2$  (HR 1.0 [95% CI 0.83–1.19]) compared with the reference group (22.5–24.9  $\text{kg}/\text{m}^2$ ) in individuals with type 2 diabetes (5). It might be interpreted that BMI ranges associated with the lowest mortality changed at  $\sim 3 \text{ kg}/\text{m}^2$  with increasing age and incident diabetes, in accordance with our results. However, directly comparing our findings with those of the NHS is difficult because of the differences in the analytical populations (all participants rather than those with normoglycemia in Manson et al. [19]) and follow-up time. Few previous studies examined sex- and age-specific associations with diabetes status (5,15). Higher optimal BMI with worsening diabetes was more apparent in women, especially at younger ages. Higher optimal BMI with advancing age was more apparent in normoglycemia than in prevalent diabetes, where it was subtle.

## Potential Mechanism for Higher Optimal BMI With Worsening Diabetes

Greater BMI indicates increased muscle or fat, or both. Growing evidence suggests that higher muscle quantity and quality are associated with better survival (20,21). Aging and chronic diseases, including diabetes, are associated with reduced lean body mass, especially muscle mass (11,22), and loss of muscle mass and function with advancing age was greater in people with versus without diabetes (22,23).

Previous studies have suggested that adipose tissue may provide some protective benefit, especially in people with disease (10,11,20,24). Some studies suggest

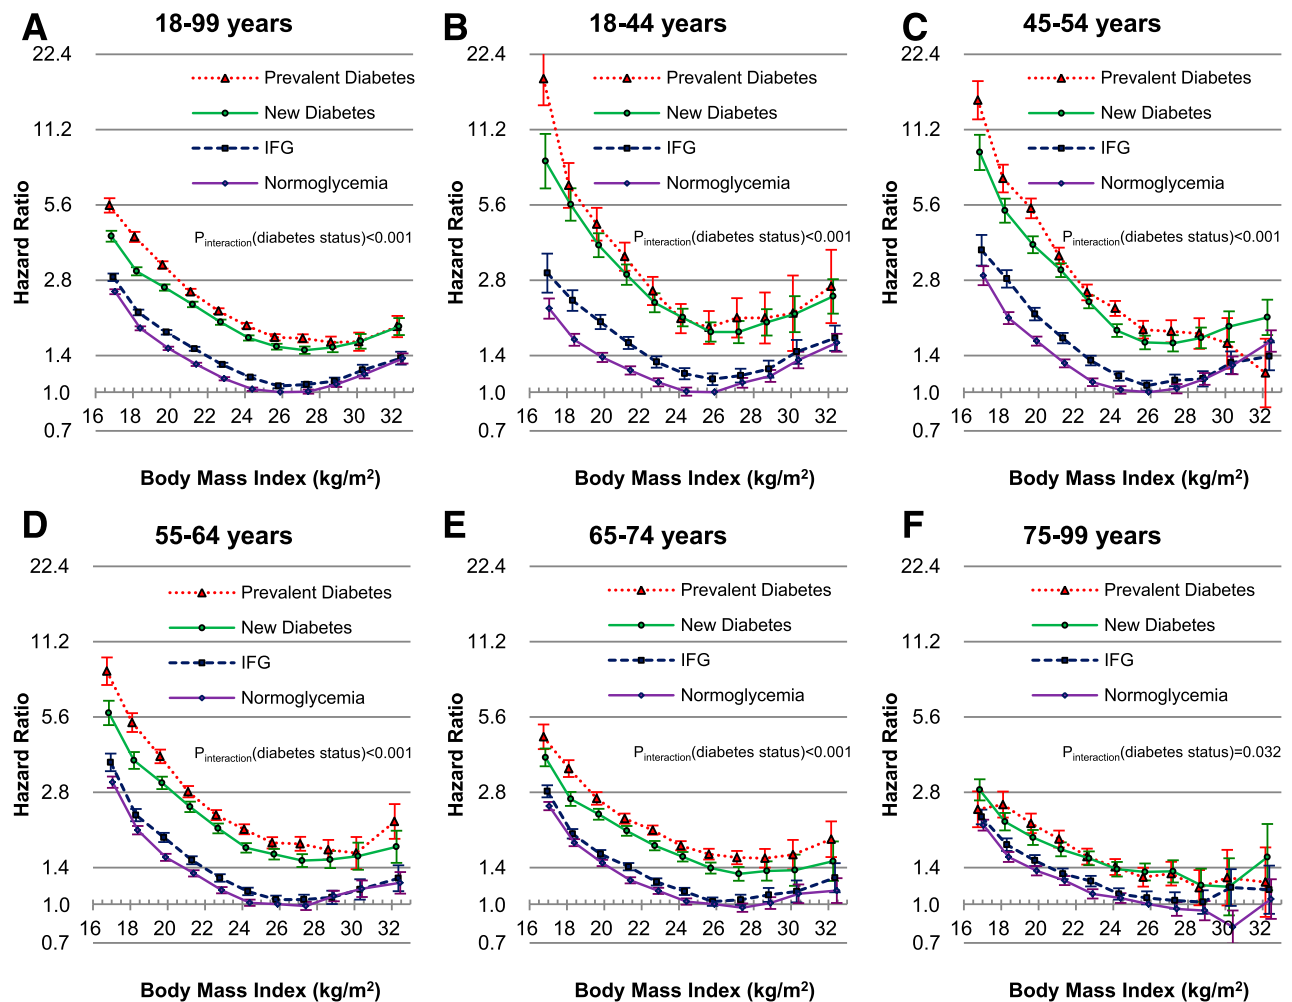

**Figure 2**—HRs for mortality in 44 BMI–diabetes status combined categories by age in men: 18–99 years (A), 18–44 years (B), 45–54 years (C), 55–64 years (D), 65–74 years (E), and 75–99 years (F). BMI categories ( $\text{kg}/\text{m}^2$ ): <math>< 17.5</math>, 17.5–18.9, 19.0–20.4, 20.5–21.9, 22.0–23.4, 23.5–24.9, 25.0–26.4, 26.5–27.9, 28.0–29.4, 29.5–30.9, and  $\geq 31.0$ . Normoglycemic people with BMI 25–26.4 were the reference group. The midpoint was used as a representative value for each BMI category, except for both ends (16.9 and 32.3), for which the median of all participants was used. HRs and 95% CIs were calculated using Cox proportional hazards models stratified by baseline age (18–24, 25–34, 35–44, 45–54, 55–64, 65–74, 75–84, and 85–99 years) after adjustment for age at baseline as a continuous variable (within each age-group), smoking status, alcohol use, and physical activity.

that adipose tissue serves as a metabolic reservoir, protecting other tissues from lipotoxicity and ectopic fat accumulation as well as buffering the influx of dietary fats (25,26). As diabetes worsens, circulating levels of glucose and fatty acids increase, causing chronic complications. In a person with a good capacity to transport this excess energy into fat tissues, body fat will increase while the individual remains metabolically stable (healthy). However, the exact role of adiposity in the association between BMI and mortality, especially according to disease status, has not yet been elucidated. In addition, a recent study reported that body fat distribution, rather than BMI, was associated with the risk of incident cardiovascular events (27), although few studies, if any,

have examined whether the role of body fat differs by distribution site according to diabetes status. Further studies are needed to determine the differential role of adipose tissue, according to its distribution, on clinical outcomes such as mortality.

Reverse causality or confounding by smoking history has been considered a possible explanation of the different optimal BMIs according to diabetes status and a U-curve association between BMI and mortality (5). However, with exclusion of individuals who died during the first 3 years of follow-up, ever smokers, and those with known heart disease, stroke, or cancer, the primary findings did not substantially change (Supplementary Tables 3–5 and Supplementary Figs. 3–5).

In addition, differences in optimal BMI according to diabetes status were more apparent at younger ages, when undetected comorbid illness was least common; thus, reverse causation or smoking-related confounding is unlikely to wholly explain our results.

Because excess adiposity is associated with the development of diabetes, some researchers have suggested that individuals with a lower BMI at diabetes diagnosis may have other risk factors for overall death (2). However, people with diabetes and normal weight had lower blood pressure and total cholesterol levels compared with those who were overweight or obese (Supplementary Table 12). Genetic variants associated specifically with lean diabetes have been

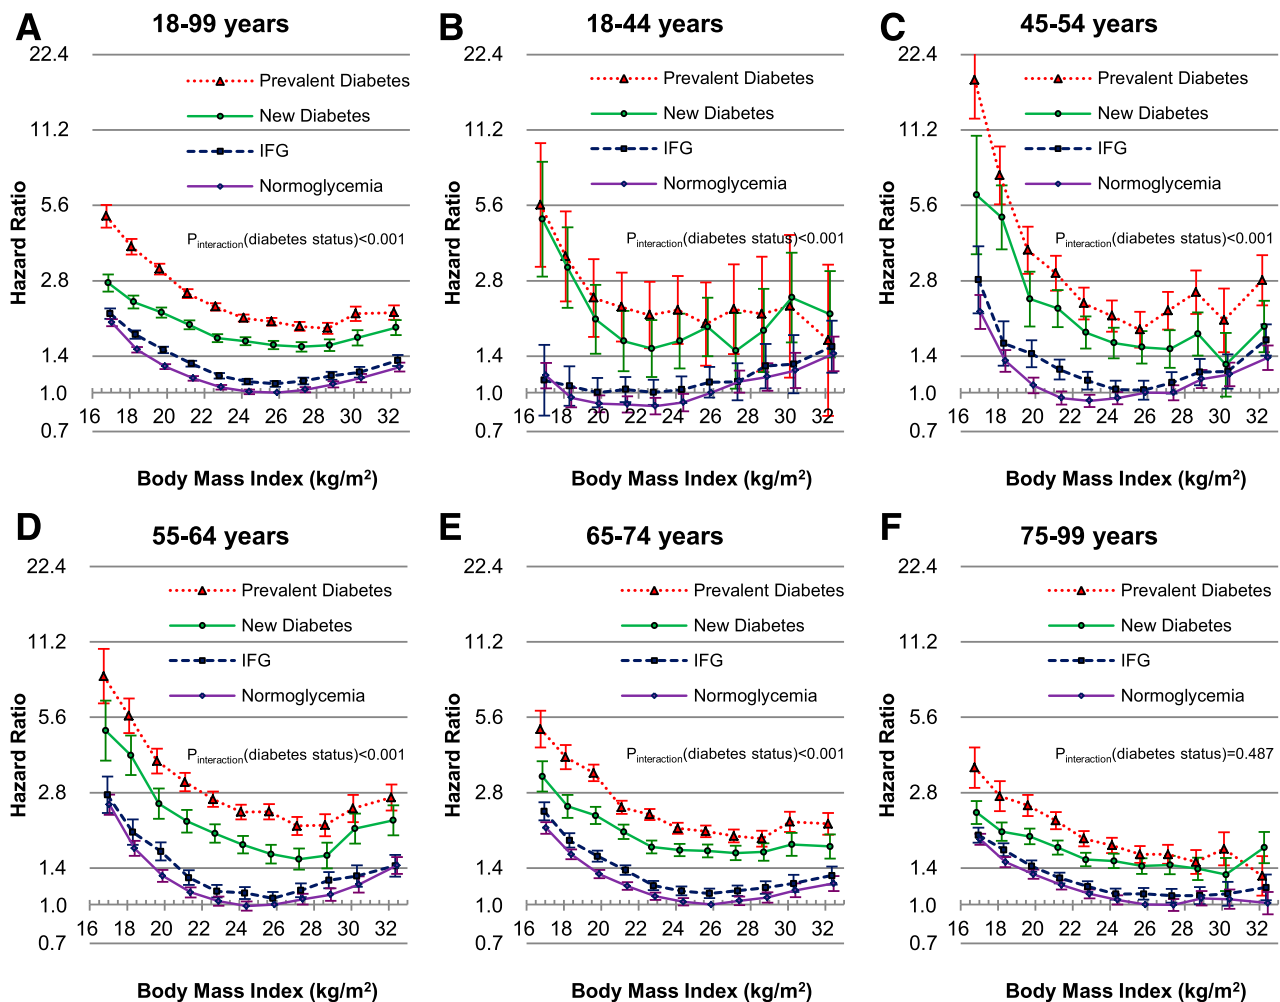

**Figure 3**—HRs for mortality in 44 BMI–diabetes status combined categories by age in women: 18–99 years (A), 18–44 years (B), 45–54 years (C), 55–64 years (D), 65–74 years (E), and 75–99 years (F). BMI categories ( $\text{kg}/\text{m}^2$ ): <math>< 17.5</math>, 17.5–18.9, 19.0–20.4, 20.5–21.9, 22.0–23.4, 23.5–24.9, 25.0–26.4, 26.5–27.9, 28.0–29.4, 29.5–30.9, and  $\geq 31.0$ . Normoglycemic individuals with BMI 25–26.4 were the reference group. The midpoint was used as a representative value for each BMI category, except for both ends (16.9 and 32.3), for which the median of all participants was used. HRs and 95% CIs were calculated using Cox proportional hazards models stratified by baseline age (18–24, 25–34, 35–44, 45–54, 55–64, 65–74, 75–84, and 85–99 years) (if applicable) after adjustment for age at baseline as a continuous variable (within each age-group), smoking history, alcohol use, and physical activity.

suggested (28). It is of interest to examine whether those variants are associated with poorer survival.

#### Patterns of Association Between BMI and Mortality by Diabetes Status, Age, and Sex

As diabetes status worsened, mortality increased. This effect was strongest with lower BMI, especially at younger ages. There are several possible explanations. First, this may be the effect of potential unmeasured confounders; for example, young and lean people with newly diagnosed diabetes may be genetically predisposed to poor prognosis. Previous studies have shown lower mass and greater failure of  $\beta$ -cells in lean people (29,30). Second, younger people may have no

comorbidities; thus, mortality associated with diabetes could be greater in this group. However, this does not explain why the association is stronger at lower BMI. Third, type 1 diabetes may be more prevalent in young and lean individuals. However, evidence is growing that young-onset type 2 diabetes is associated with greater complications and mortality compared with type 1 diabetes (31,32). In addition, the percentage of type 1 diabetes in young adults (20–39 years old) with diabetes was estimated to be below 10% in the Korean population (33,34). Thus, a potentially higher proportion of type 1 diabetes in young adults than in older adults may not totally explain the observed findings. Our observation, that in young-onset diabetes, normal weight

and underweight contribute more to reduced longevity compared with overweight and obesity, requires elucidation. Because young-onset diabetes is a major health issue requiring immediate action, further research to better understand underlying mechanisms are needed to improve the health of young people with diabetes.

Mortality in prevalent diabetes relative to newly diagnosed diabetes was higher in women than in men. Although the mechanism is unclear, differences in the biological response to hyperglycemia and cardiometabolic risk factors between sexes, along with poorer compliance and management in women with diabetes, may explain these findings (35,36). Further research to explore sex differences

and their underlying mechanisms is needed to better manage patients with diabetes.

### Study Strengths and Limitations

Our study revealed that the association between BMI and mortality changed as diabetes worsened. We analyzed specific BMI ranges and conducted stratified analyses by sex, age, and smoking status. The study's prospective design and long follow-up period are definite strengths. Data were analyzed after adjusting for potential confounders, including smoking history and physical activity level. Effects of additional adjustment of metabolic mediators, such as blood pressure, fasting glucose, and total cholesterol, were also examined. In sensitivity analyses, exclusion of participants with comorbid conditions and those who died within the first 3 years of follow-up strengthened the analyses, as did the objective measurement of BMI.

Notwithstanding, the study has some limitations, which may be addressed by further investigation. One limitation is the lack of information on specific causes of death. Another is that we did not examine other measures of adiposity or skeletal muscle mass. Also, information relevant to diabetes, such as duration, type, severity, or treatment, was not examined. Regarding the type of diabetes, according to a recent research report, among adults aged 20–39 years with diabetes, the percentage of type 1 diabetes was <10% (33). Therefore, we surmise that most people with diabetes in our study generally have type 2 diabetes, even those aged 18–44 years. This analysis was based on a single baseline BMI measurement, which limited our ability to evaluate the effect of changing BMI on mortality. We also cannot rule out that our observed difference may be partially explained by collider stratification bias (37). And last, although we posited explanations for our findings, we could not completely exclude reverse causality or the effects of unmeasured confounding factors. The homogenous ethnic population may be considered a limitation for generalizability, but we consistently observed U-curve associations and higher optimal BMI with worsening diabetes status independent of sex and age. Participants likely had varying body shapes, cardiometabolic profiles, and comorbidities according to sex and age, which

contributes to increase generalizability including to other ethnic populations.

### Summary

In this large prospective study, we observed a similar U-curve association between BMI and mortality, regardless of diabetes status, sex, and age. We also observed increasing mortality risk with worsening diabetes status, which was more prominent as BMI was lower, especially at younger ages. The optimal BMI for longevity became gradually higher with worsening diabetes status in each sex and all age-groups group, except perhaps for people aged  $\geq 75$  years.

**Acknowledgments.** The authors thank the staff at the Big Data Steering Department at the NHIS for providing data and support and Caron Modreas (University of North Carolina) for improving the use of English in the manuscript.

**Funding.** This work was supported by research funds from Catholic Kwandong University. Health examinations were funded and managed by the NHIS of Korea.

Catholic Kwandong University had no role in the study design, data collection, the writing of the manuscript, or the decision to submit the manuscript for publication. The data from NHIS were provided under the condition that the NHIS would be given opportunity to comment on the manuscript before submission for publication.

**Duality of Interest.** No potential conflicts of interest relevant to this article were reported.

**Author Contributions.** E.Y.L., Y.-h.L., and S.-W.Y. searched the literature and wrote the manuscript. E.Y.L., Y.-h.L., S.-W.Y., S.-A.S., and J.-J.Y. analyzed and interpreted the data. S.-W.Y. conceived the study concept and design. S.W.Y. and S.-A.S. acquired data. All authors contributed to critical revision of the manuscript and read and approved the final submitted version of the manuscript. S.W.Y. is the guarantor of this work and, as such, had full access to all the data in the study and takes responsibility for the integrity of the data and the accuracy of the data analysis.

### References

- Carnethon MR, De Chavez PJD, Biggs ML, et al. Association of weight status with mortality in adults with incident diabetes. *JAMA* 2012;308:581–590
- Lajous M, Bijon A, Fagherazzi G, et al. Body mass index, diabetes, and mortality in French women: explaining away a “paradox”. *Epidemiology* 2014;25:10–14
- Logue J, Walker JJ, Leese G, et al.; Scottish Diabetes Research Network Epidemiology Group. Association between BMI measured within a year after diagnosis of type 2 diabetes and mortality. *Diabetes Care* 2013;36:887–893
- Costanzo P, Cleland JG, Pellicori P, et al. The obesity paradox in type 2 diabetes mellitus: relationship of body mass index to prognosis: a cohort study. *Ann Intern Med* 2015;162:610–618

- Tobias DK, Pan A, Jackson CL, et al. Body-mass index and mortality among adults with incident type 2 diabetes. *N Engl J Med* 2014;370:233–244
- Eeg-Olofsson K, Cederholm J, Nilsson PM, et al. Risk of cardiovascular disease and mortality in overweight and obese patients with type 2 diabetes: an observational study in 13,087 patients. *Diabetologia* 2009;52:65–73
- Flegal KM, Kit BK, Orpana H, Graubard BI. Association of all-cause mortality with overweight and obesity using standard body mass index categories: a systematic review and meta-analysis. *JAMA* 2013;309:71–82
- Kim NH, Lee J, Kim TJ, et al. Body mass index and mortality in the general population and in subjects with chronic disease in Korea: a nationwide cohort study (2002–2010). *PLoS One* 2015; 10:e0139924
- Kalantar-Zadeh K, Kopple JD. Obesity paradox in patients on maintenance dialysis. *Contrib Nephrol* 2006;151:57–69
- Lavie CJ, De Schutter A, Patel DA, Romero-Corral A, Artham SM, Milani RV. Body composition and survival in stable coronary heart disease: impact of lean mass index and body fat in the “obesity paradox”. *J Am Coll Cardiol* 2012;60:1374–1380
- Dixon JB, Egger GJ, Finkelstein EA, Kral JG, Lambert GW. ‘Obesity paradox’ misunderstands the biology of optimal weight throughout the life cycle. *Int J Obes* 2015;39:82–84
- Yi SW, Ohrr H, Shin SA, Yi JJ. Sex-age-specific association of body mass index with all-cause mortality among 12.8 million Korean adults: a prospective cohort study. *Int J Epidemiol* 2015;44:1696–1705
- Zheng W, McLerran DF, Rolland B, et al. Association between body-mass index and risk of death in more than 1 million Asians. *N Engl J Med* 2011;364:719–729
- Khalangot M, Tronko M, Kravchenko V, Kulchinska J, Hu G. Body mass index and the risk of total and cardiovascular mortality among patients with type 2 diabetes: a large prospective study in Ukraine. *Heart* 2009;95:454–460
- Tanaka S, Tanaka S, Iimuro S, et al.; Japan Diabetes Complications Study Group and the Japanese Elderly Diabetes Intervention Trial Group. Body mass index and mortality among Japanese patients with type 2 diabetes: pooled analysis of the Japan Diabetes Complications Study and the Japanese Elderly Diabetes Intervention Trial. *J Clin Endocrinol Metab* 2014;99:E2692–E2696
- Jackson CL, Yeh HC, Szklo M, et al. Body-mass index and all-cause mortality in US adults with and without diabetes. *J Gen Intern Med* 2014; 29:25–33
- Jerant A, Franks P. Body mass index, diabetes, hypertension, and short-term mortality: a population-based observational study, 2000–2006. *J Am Board Fam Med* 2012;25:422–431
- Afzal S, Tybjaerg-Hansen A, Jensen GB, Nordestgaard BG. Change in body mass index associated with lowest mortality in Denmark, 1976–2013. *JAMA* 2016;315:1989–1996
- Manson JE, Willett WC, Stampfer MJ, et al. Body weight and mortality among women. *N Engl J Med* 1995;333:677–685
- Murphy RA, Reinders I, Garcia ME, et al.; Age, Gene/Environment Susceptibility-Reykjavik Study (AGES-Reykjavik). Adipose tissue, muscle, and function: potential mediators of associations

between body weight and mortality in older adults with type 2 diabetes. *Diabetes Care* 2014; 37:3213–3219

21. Gonzalez MC, Pastore CA, Orlandi SP, Heymsfield SB. Obesity paradox in cancer: new insights provided by body composition. *Am J Clin Nutr* 2014;99:999–1005
22. Park SW, Goodpaster BH, Lee JS, et al.; Health, Aging, and Body Composition Study. Excessive loss of skeletal muscle mass in older adults with type 2 diabetes. *Diabetes Care* 2009;32:1993–1997
23. Park SW, Goodpaster BH, Strotmeyer ES, et al. Decreased muscle strength and quality in older adults with type 2 diabetes: the Health, Aging, and Body Composition Study. *Diabetes* 2006;55:1813–1818
24. Wells JC. The evolution of human fatness and susceptibility to obesity: an ethological approach. *Biol Rev Camb Philos Soc* 2006;81:183–205
25. Manolopoulos KN, Karpe F, Frayn KN. Gluteofemoral body fat as a determinant of metabolic health. *Int J Obes* 2010;34:949–959
26. Lemieux I. Energy partitioning in gluteal-femoral fat: does the metabolic fate of triglycerides affect coronary heart disease risk? *Arterioscler Thromb Vasc Biol* 2004;24:795–797
27. Neeland IJ, Turer AT, Ayers CR, et al. Body fat distribution and incident cardiovascular disease in obese adults. *J Am Coll Cardiol* 2015;65:2150–2151
28. Perry JR, Voight BF, Yengo L, et al.; MAGIC; DIAGRAM Consortium; GIANT Consortium. Stratifying type 2 diabetes cases by BMI identifies genetic risk variants in LAMA1 and enrichment for risk variants in lean compared to obese cases. *PLoS Genet* 2012;8:e1002741
29. Rahier J, Guiot Y, Goebbels RM, Sempoux C, Henquin JC. Pancreatic beta-cell mass in European subjects with type 2 diabetes. *Diabetes Obes Metab* 2008;10(Suppl. 4):32–42
30. Yoon KH, Ko SH, Cho JH, et al. Selective beta-cell loss and alpha-cell expansion in patients with type 2 diabetes mellitus in Korea. *J Clin Endocrinol Metab* 2003;88:2300–2308
31. Constantino MI, Molyneaux L, Limacher-Gisler F, et al. Long-term complications and mortality in young-onset diabetes: type 2 diabetes is more hazardous and lethal than type 1 diabetes. *Diabetes Care* 2013;36:3863–3869
32. Song SH. Complication characteristics between young-onset type 2 versus type 1 diabetes in a UK population. *BMJ Open Diabetes Res Care* 2015;3:e000044
33. Song SO, Song YD, Nam JY, et al. Epidemiology of type 1 diabetes mellitus in Korea through an investigation of the National Registration Project of Type 1 diabetes for the reimbursement of glucometer strips with additional analyses using claims data. *Diabetes Metab J* 2016; 40:35–45
34. Song SO, Song YD, Kim DW, et al. *A research of prevalence and characteristics of diabetes in Korea over past 10 years using National Health Insurance Service data*. Research report 2014-20-009. Goyang, National Health Insurance Service Ilsan Hospital, 2014 [in Korean]
35. Peters SA, Huxley RR, Sattar N, Woodward M. Sex differences in the excess risk of cardiovascular diseases associated with type 2 diabetes: potential explanations and clinical implications. *Curr Cardiovasc Risk Rep* 2015;9:36
36. Cherney DZ, Scholey JW, Sothett EB. Sex differences in renal responses to hyperglycemia, L-arginine, and L-NMMA in humans with uncomplicated type 1 diabetes. *Diabetes Care* 2013;36:1290–1296
37. Sperrin M, Candlish J, Badrick E, Renehan A, Buchan I. Collider bias is only a partial explanation for the obesity paradox. *Epidemiology* 2016;27: 525–530
